# Supplementary material for: Functional characterization of the ZEB2 regulatory landscape
Source: PubMed Central journal article supplement (PMC6466108; doi:10.1093/hmg/ddy440), 2018-12-26

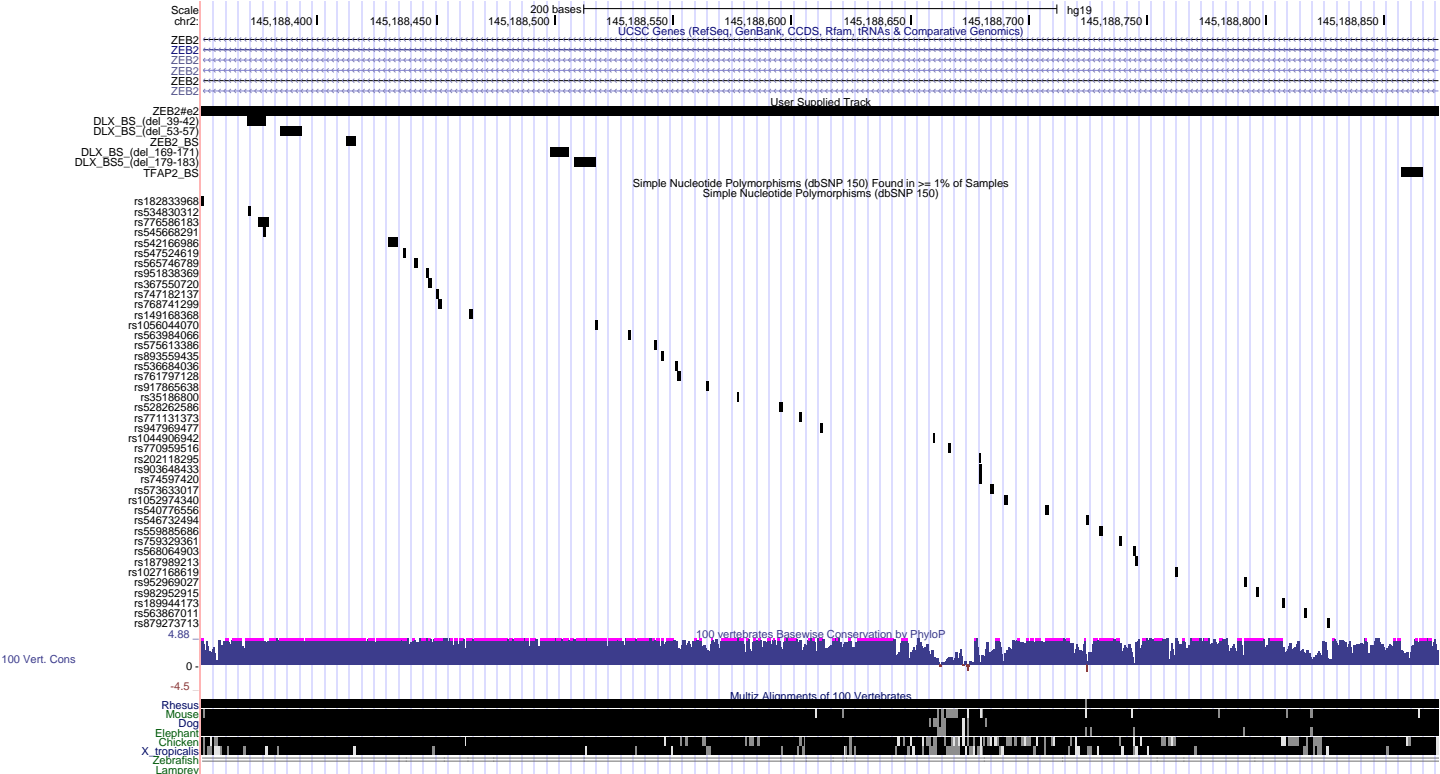

Supplement: ddy440_s7.pdf [file ddy440_s7.pdf]
